# Supplementary material for: Can Microbial Consortium Applications Affect Yield and Quality of Conventionally Managed Processing Tomato?
Source: MDPI journal article supplement (doi:10.3390/plants12010014), 2022-12-20
Supplement: s1 [file s1]

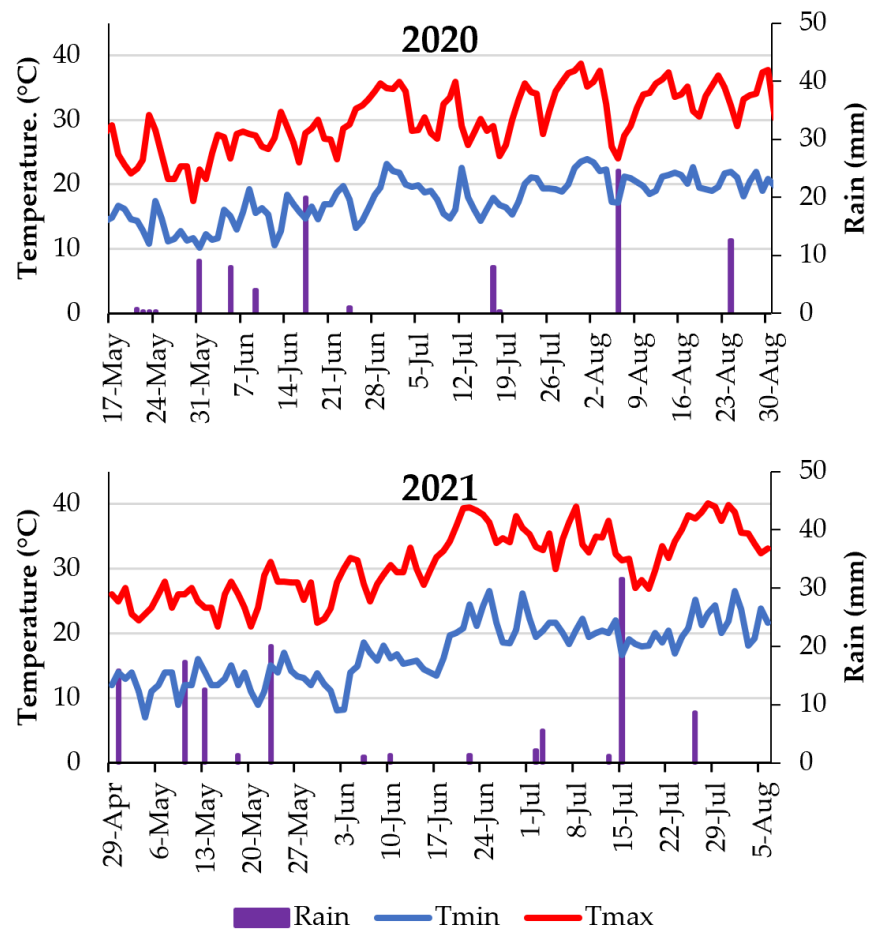

**Figure S1.** The mean maximum and minimum air temperatures and total rainfall during 2020 and 2021 growing seasons.
