# Supplementary material for: Can Microbial Consortium Applications Affect Yield and Quality of Conventionally Managed Processing Tomato?
Source: MDPI journal article supplement (doi:10.3390/plants12010014), 2022-12-20
Supplement: s1 [file s1]

**Table S1.** Detailed composition of commercial formulations containing different microbial consortia.

| Commercial Product              | Composition                                                                                                                                                              | %                                          |
|---------------------------------|--------------------------------------------------------------------------------------------------------------------------------------------------------------------------|--------------------------------------------|
| <b>Micosat F Tab Plus (MIC)</b> | Mycorrhizal fungi ( <i>Glomus coronatum</i> GU 53, <i>G. caledonium</i> GM 24, <i>G. mosseae</i> GP 11 e <i>G. viscosum</i> GC 41, <i>Rhizophagus irregularis</i> RI 31) | 10.0%                                      |
|                                 | Rhizobacteria ( <i>B. subtilis</i> BA 41, <i>Streptomyces</i> spp. SB 19)                                                                                                |                                            |
|                                 | Yeasts ( <i>Pichia pastoris</i> PP59)                                                                                                                                    | 7.5%                                       |
|                                 | Trichoderma fungi ( <i>Trichoderma harzanium</i> TH01 and <i>T. viride</i> TV03)                                                                                         | 10.2 x 10 <sup>7</sup> CFU g <sup>-1</sup> |
| <b>EKOprop NX (EKO)</b>         | Mycorrhizal fungi ( <i>Glomus</i> spp.)                                                                                                                                  | 1%                                         |
|                                 | Rhizobacteria ( <i>Bacillus</i> spp., <i>Streptomyces</i> spp., <i>Pseudomonas</i> spp.)                                                                                 | 2.3x10 <sup>6</sup> CFU g <sup>-1</sup>    |
|                                 | Rhizosphere fungi ( <i>Arthrobotrys</i> spp., <i>Monacrosporium</i> spp., <i>Paecilomyces</i> spp., <i>Myrothecium</i> spp.)                                             | 1x10 <sup>6</sup> CFU g <sup>-1</sup>      |
|                                 | Trichoderma fungi ( <i>Trichoderma</i> spp.)                                                                                                                             | 5x10 <sup>6</sup> CFU g <sup>-1</sup>      |
| <b>Fidelius (FID)</b>           | Mycorrhizal fungi ( <i>Glomus aggregatum</i> , <i>G. intraradices</i> , <i>G. mossae</i> , <i>G. etunicatum</i> )                                                        | 12.0%                                      |
|                                 | Rhizobacteria ( <i>Bacillus amyloliquefaciens</i> , <i>B. licheniformis</i> , <i>B. subtilis</i> , <i>B. laterosporus</i> , <i>B. mojavensis</i> )                       | 6x10 <sup>6</sup> CFU g <sup>-1</sup>      |
|                                 | Trichoderma fungi ( <i>Trichoderma harzanium</i> , <i>T. koningii</i> )                                                                                                  | 1.5x10 <sup>4</sup> CFU g <sup>-1</sup>    |
